# Supplementary material for: The long non-coding RNA LINC00707 interacts with Smad proteins to regulate TGFβ signaling and cancer cell invasion
Source: PubMed Central journal article supplement (PMC10544626; doi:10.1186/s12964-023-01273-3), 2023-10-02
Supplement: 12964_2023_1273_MOESM1_ESM.pdf [file 12964_2023_1273_MOESM1_ESM.pdf]

**The long non-coding RNA *LINC00707* interacts with Smad proteins to regulate TGF $\beta$  signaling and cancer cell invasion**

Caroline Gélabert, Panagiotis Papoutsoglou, Irene Cancela Golan, Eric Ahlström, Adam Ameer, Carl-Henrik Heldin, Laia Caja, and Aristidis Moustakas

**Additional Information**

**Additional file 1.**

**Table S1: siRNAs and plasmids used for transfections.**

|                                |                                                                                                                                         |
|--------------------------------|-----------------------------------------------------------------------------------------------------------------------------------------|
| <b><i>siControl</i></b>        | <i>ON-TARGETplus Non-targeting Pool. Dharmacon Inc./GE Healthcare/Horizon Group, Lafayette, CO, USA. Ref: D-001810-10-20</i>            |
| <b><i>siSmad2</i></b>          | <i>ON-TARGETplus Human Smad2 siRNA SMARTpool. Dharmacon Inc./GE Healthcare/Horizon Group, Lafayette, CO, USA. Ref: L-003561-00-0005</i> |
| <b><i>siSmad3</i></b>          | <i>ON-TARGETplus Human Smad3 siRNA SMARTpool. Dharmacon Inc./GE Healthcare/Horizon Group, Lafayette, CO, USA. Ref: L-020067-00-0005</i> |
| <b><i>siSmad4</i></b>          | <i>ON-TARGETplus Human Smad4 siRNA SMARTpool. Dharmacon Inc./GE Healthcare/Horizon Group, Lafayette, CO, USA. Ref: L-003902-00-0005</i> |
| <b><i>siLINC00707</i></b>      | <i>Lincode Human LINC00707 siRNA SMARTpool. Dharmacon Inc./GE Healthcare/Horizon Group, Lafayette, CO, USA. Ref: R-188521-00-0005</i>   |
| <b><i>pcDNA3</i></b>           | <i>Obtained from our lab stock and as previously described {Papoutsoglou, 2019 #3354}.</i>                                              |
| <b><i>pcDNA3-LINC00707</i></b> | <i>Constructed in-house as described here.</i>                                                                                          |
| <b><i>siKLF6</i></b>           | <i>ON-TARGETplus Human KLF6 siRNA SMARTpool. Dharmacon Inc./GE Healthcare/Horizon Group, Lafayette, CO, USA. Ref: L-021441-00-0005</i>  |
