# Supplementary material for: The long non-coding RNA LINC00707 interacts with Smad proteins to regulate TGFβ signaling and cancer cell invasion
Source: PubMed Central journal article supplement (PMC10544626; doi:10.1186/s12964-023-01273-3), 2023-10-02
Supplement: 12964_2023_1273_MOESM2_ESM.pdf [file 12964_2023_1273_MOESM2_ESM.pdf]

**Additional file 2.**

**Table S2: Oligonucleotides used for RT-qPCR, RIP, ChOP and ChIP.**

|                              |                                                      |
|------------------------------|------------------------------------------------------|
| <b><i>LINC00707 Set1</i></b> | Eurofins Sweden, Uppsala, Sweden; H455, RT-qPCR, RIP |
| <i>Fw:</i>                   | CCT-TCG-GCC-CAT-TTC-TCA-CT                           |
| <i>Rev:</i>                  | ATC-ACG-GTG-GCA-GTA-TCG-TG                           |
| <b><i>LINC00707 Set2</i></b> | Eurofins Sweden, Uppsala, Sweden, RT-qPCR            |
| <i>Fw:</i>                   | CCT-TCG-GCC-CAT-TTC-TCA-CT                           |
| <i>Rev:</i>                  | ATC-ACG-GTG-GCA-GTA-TCG-TG                           |
| <b><i>PAI-1</i></b>          | Eurofins Sweden, Uppsala, Sweden; H789, RT-qPCR      |
| <i>Fw:</i>                   | GAG-ACA-GGC-AGC-TCG-GAT-TC                           |
| <i>Rev:</i>                  | GGC-CTC-CCA-AAG-TGC-AAT-AC                           |
| <b><i>KLF-6</i></b>          | Eurofins Sweden, Uppsala, Sweden; H737, RT-qPCR      |
| <i>Fw:</i>                   | CAA-GGG-AAA-TGG-CGA-TGC-CT                           |
| <i>Rev:</i>                  | GGC-TTT-TCT-CCT-GTG-TGC-GT                           |
| <b><i>Smad2 Set1</i></b>     | Eurofins Sweden, Uppsala, Sweden, RT-qPCR            |
| <i>Fw:</i>                   | TGC-CTT-CGG-TAT-TCT-GCT-CCC-CA                       |
| <i>Rev:</i>                  | TGG-CTG-GCA-CCC-TGC-AAC-AG                           |
| <b><i>Smad2 Set2</i></b>     | Eurofins Sweden, Uppsala, Sweden, RT-qPCR            |
| <i>Fw:</i>                   | TGG-CTG-GCA-CCC-TGC-AAC-AG                           |
| <i>Rev:</i>                  | TGC-CTT-CGG-TAT-TCT-GCT-CCC-CA                       |
| <b><i>Smad3</i></b>          | Eurofins Sweden, Uppsala, Sweden, RT-qPCR            |
| <i>Fw:</i>                   | GCA-ATA-TTC-CAG-AGA-CCC-CAC-C                        |
| <i>Rev:</i>                  | TAG-GTT-TGG-AGA-ACC-TGC-GTC-C                        |
| <b><i>Smad4</i></b>          | Eurofins Sweden, Uppsala, Sweden, RT-qPCR            |
| <i>Fw:</i>                   | CAT-CCT-GGA-CAT-TAC-TGG-CCA                          |
| <i>Rev:</i>                  | CCT-ACC-TGA-ACG-TCC-ATT-TCA-A                        |
| <b><i>N-Cadherin</i></b>     | Eurofins Sweden, Uppsala, Sweden, RT-qPCR            |
