# Supplementary material for: The long non-coding RNA LINC00707 interacts with Smad proteins to regulate TGFβ signaling and cancer cell invasion
Source: PubMed Central journal article supplement (PMC10544626; doi:10.1186/s12964-023-01273-3), 2023-10-02
Supplement: 12964_2023_1273_MOESM5_ESM.pdf [file 12964_2023_1273_MOESM5_ESM.pdf]

**Additional File 5.**

**Additional figure titles and legends**

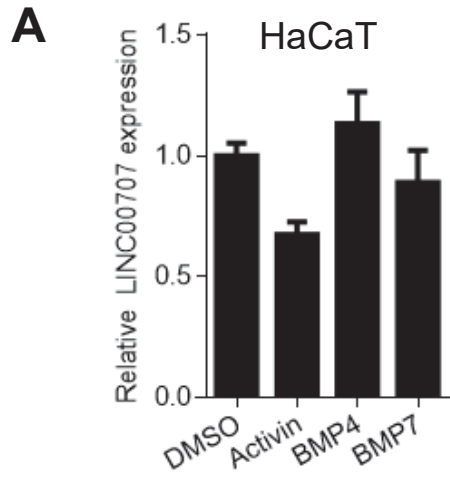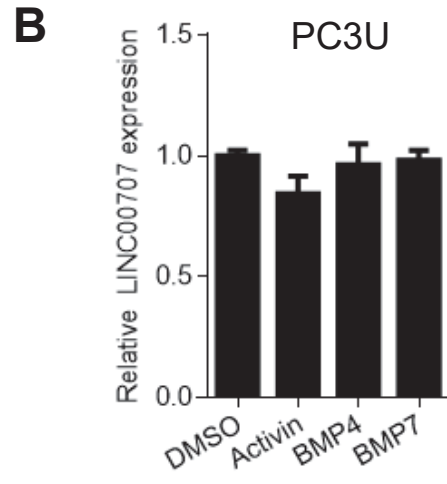

Supplemental Figure 1 related to Main Figure 1

**Fig. S1 related to Fig. 1.** LINC00707 is specifically regulated by TGF $\beta$ . (**A, B**) Real-time RT-PCR for determination of *LINC00707* mRNA levels in HaCaT (A) and PC3U (B) cells treated with activin-A (10 ng/mL), BMP4 (30 ng/mL) or BMP7 (30 ng/mL) for 24 h. Graphs present data from (n=3) biological replicates, each with three technical repeats, as means with SEM and associated significance as: \*  $p < 0.05$ , \*\*  $p < 0.01$ , \*\*\*  $p < 0.001$ , \*\*\*\*  $p < 0.0001$ . Statistical significance of the variables was assessed by ANOVA test with Bonferroni correction.

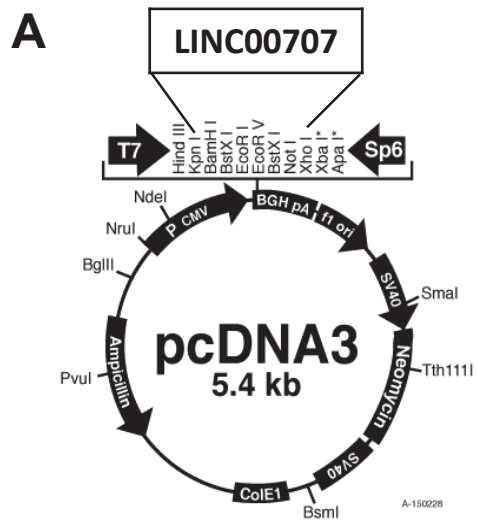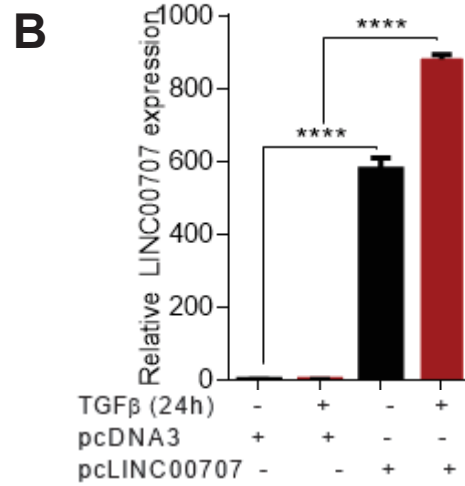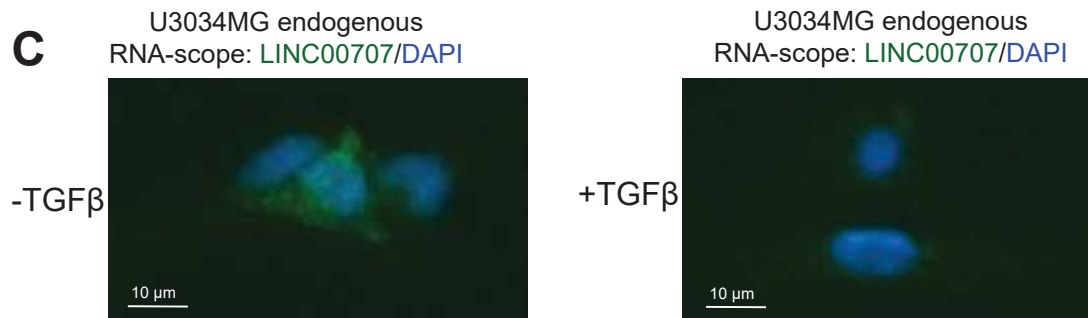

**Fig. S2 related to Fig. 2.** Efficiency of *LINC00707* overexpression in PC3U cells and regulation by TGF $\beta$  in U3034MG. **(A)** Schematic representation of the recombinant pcDNA3-LINC00707 expression vector. **(B)** Real-time RT-PCR for determination of *LINC00707* mRNA levels in PC3U cells transiently transfected with siRNA targeting *LINC00707* or control siRNA and treated with TGF $\beta$  for 24 h or not. The graph presents data from one biological replicate with three technical repeats as means with SEM and associated significance as: \*  $p < 0.05$ , \*\*  $p < 0.01$ , \*\*\*  $p < 0.01$ , \*\*\*\*  $p < 0.0001$ . Statistical significance of the variables was assessed by ANOVA test with Bonferroni correction. **(C)** RNAscope for endogenous *LINC00707* in U3034MG cells treated or not with TGF $\beta$  for 24 h. Scale bar: 10  $\mu\text{m}$ .

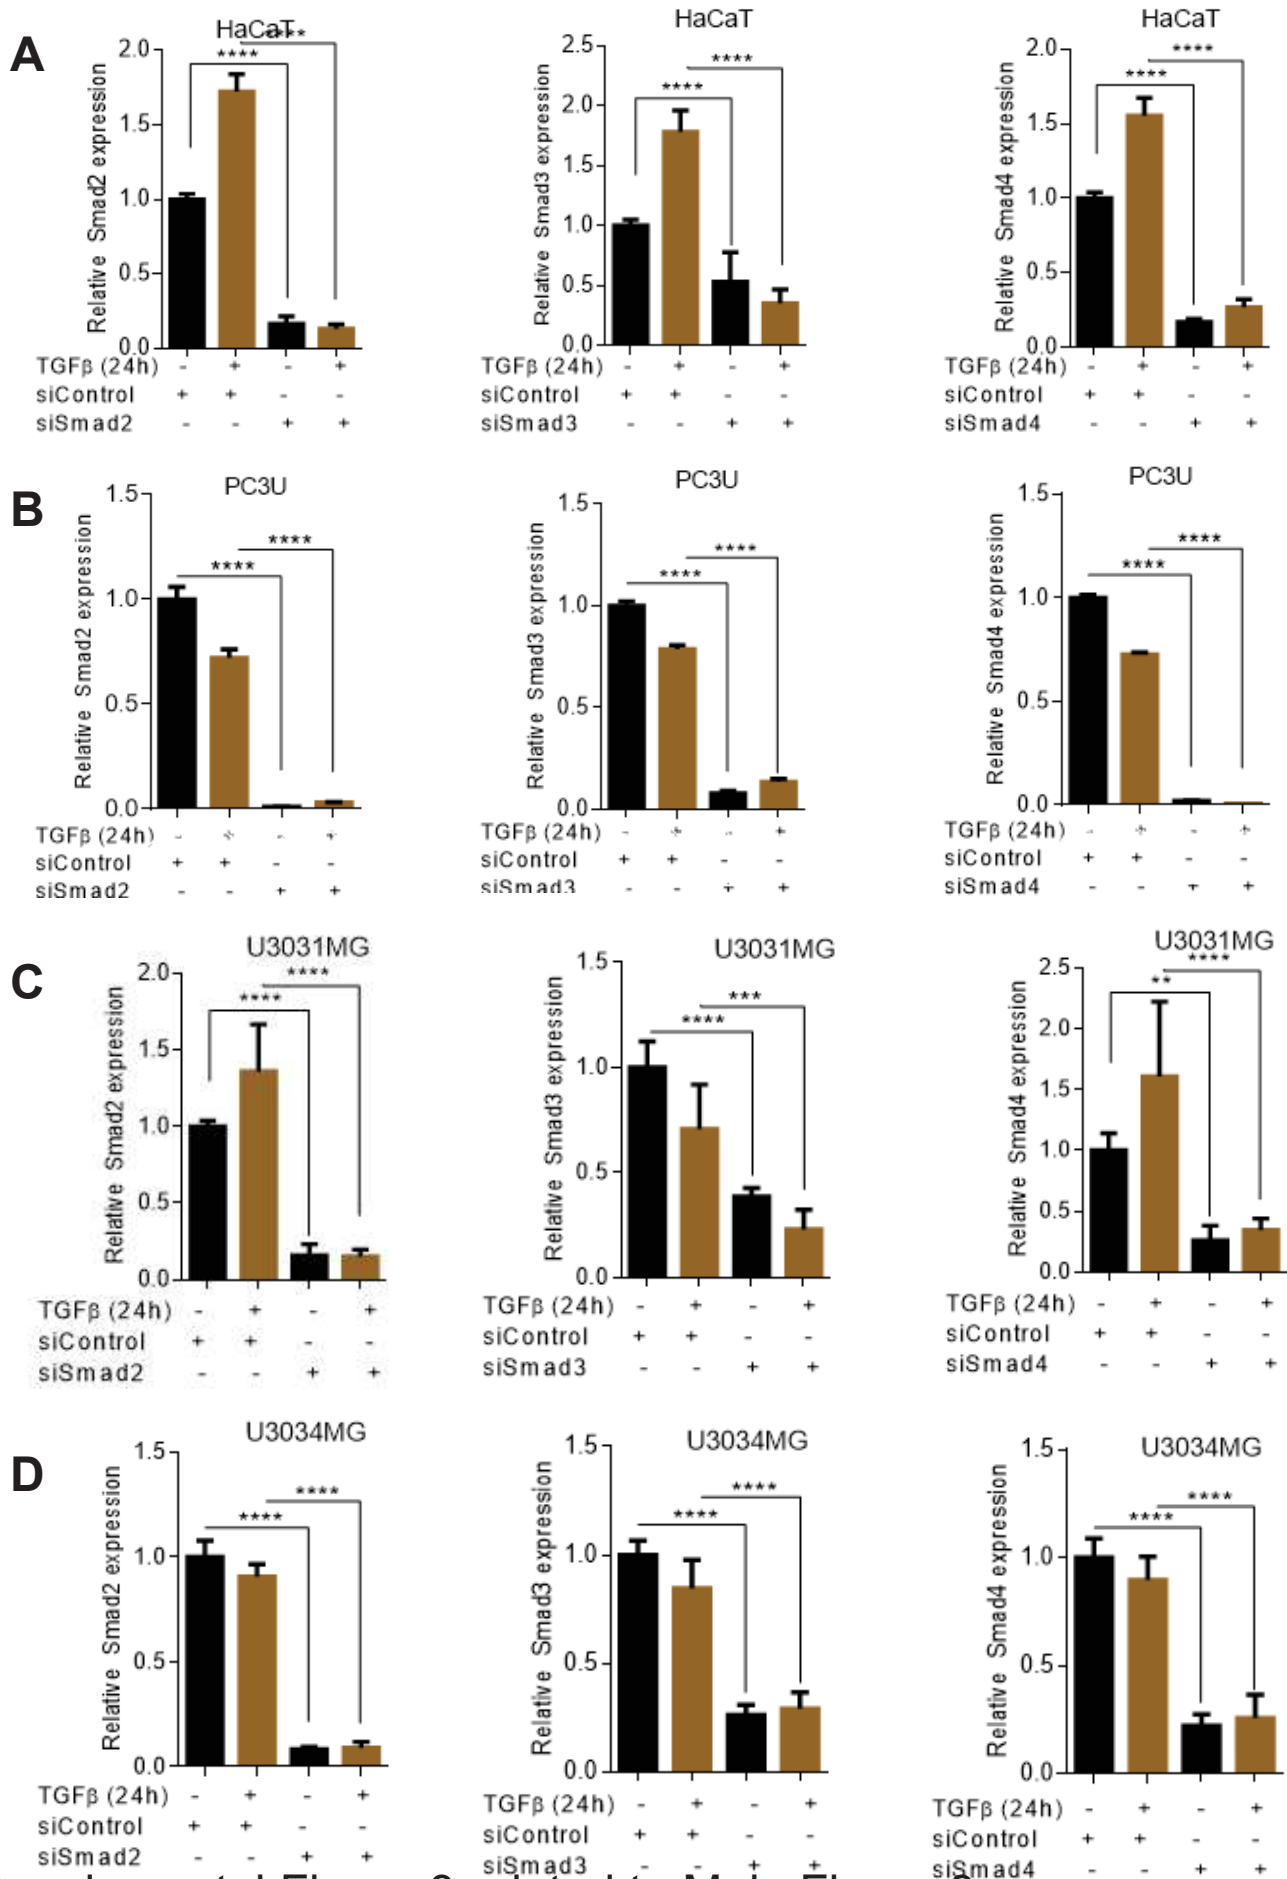

Supplemental Figure 3 related to Main Figure 3

**Fig. S3 related to Fig. 3.** Efficiency of Smad silencing in PC3U cells. **(A-D)** Real-time RT-PCR for determination of *Smad2*, *Smad3* or *Smad4* mRNA levels in HaCaT (A), PC3U (B), U3031MG (C) and U3034MG (D) cells transiently transfected with siRNAs targeting *Smad2*, *Smad3*, *Smad4* or control siRNA and treated with TGF $\beta$  for 24 h or untreated. All graphs present data from (n=2) biological replicates, each with three technical repeats, as means with SEM and associated significance as: \*  $p < 0.05$ , \*\*  $p < 0.01$ , \*\*\*  $p < 0.001$ , \*\*\*\*  $p < 0.0001$ . Statistical significance of the variables was assessed by ANOVA test with Bonferroni correction.

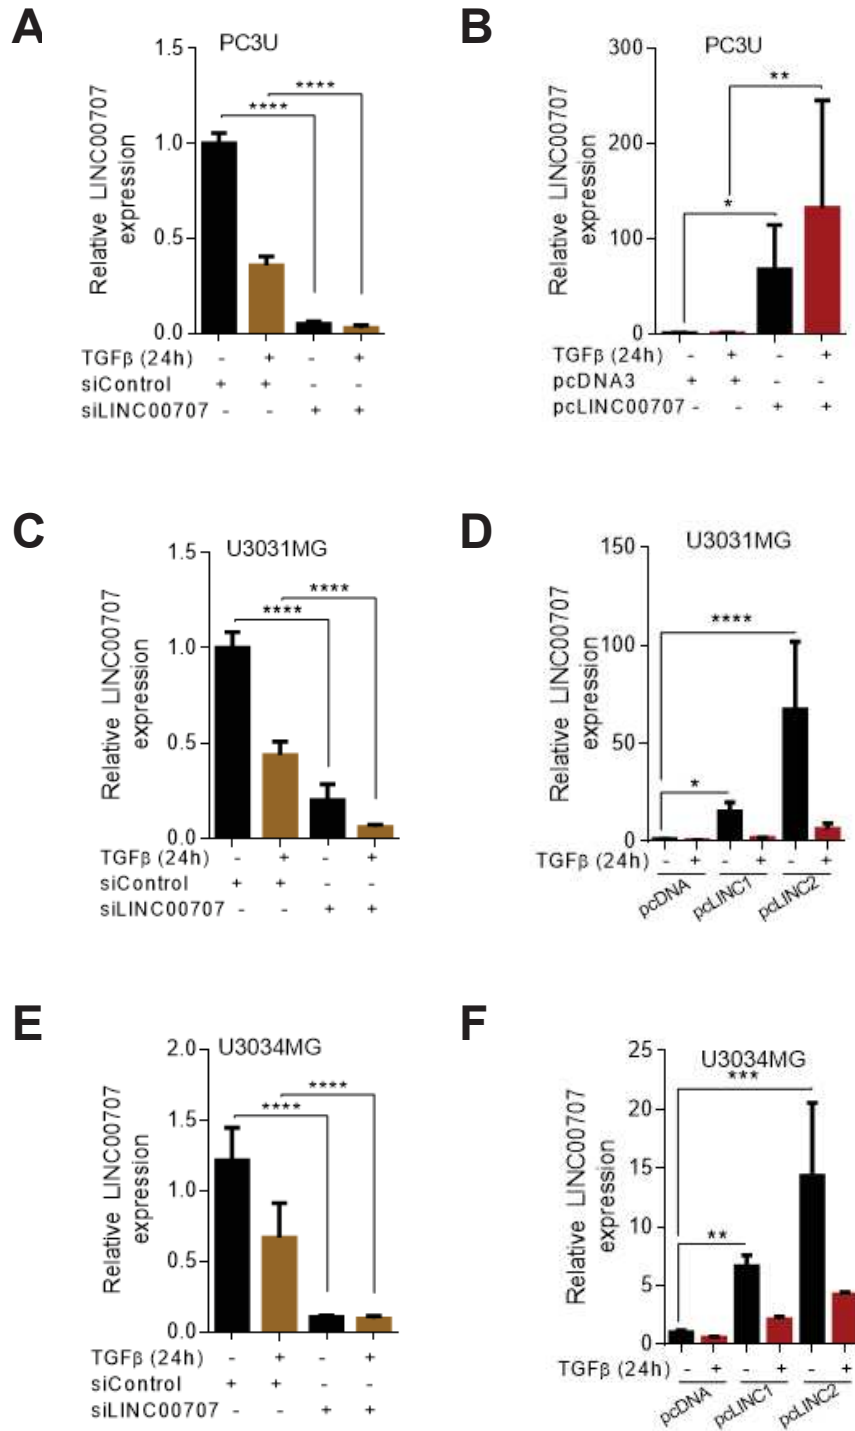

Supplemental Figure 4 related to Main Figure 5



**Fig. S4 related to Fig. 5.** Efficiency of silencing or overexpression of *LINC00707* in PC3U, U3031MG and U3034MG cells. **(A-F)** Real-time RT-PCR for determination of *LINC00707* mRNA levels in PC3U (A, B), U3031MG (C, D) and U3034MG (E, F) cells transiently transfected with siRNA targeting *LINC00707* or control siRNA (A, C, E), or transiently overexpressing pcDNA3-*LINC00707* or control pcDNA3 (B, D, F). Cells were treated with TGF $\beta$  or not for 24 h. All graphs present data from triplicate assays as means with SEM. All graphs present data from (n=2) biological replicates, each with three technical repeats, as means with SEM and associated significance as: \*  $p < 0.05$ , \*\*  $p < 0.01$ , \*\*\*  $p < 0.001$ , \*\*\*\*  $p < 0.0001$ . Statistical significance of the variables was assessed by ANOVA test with Bonferroni correction.

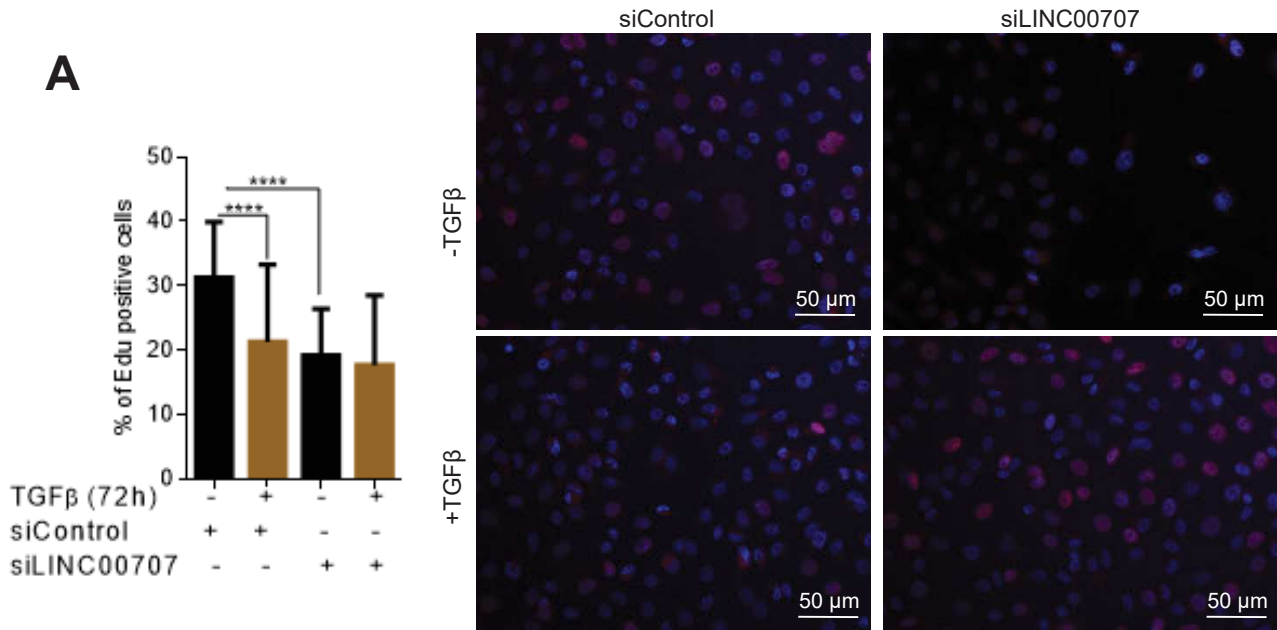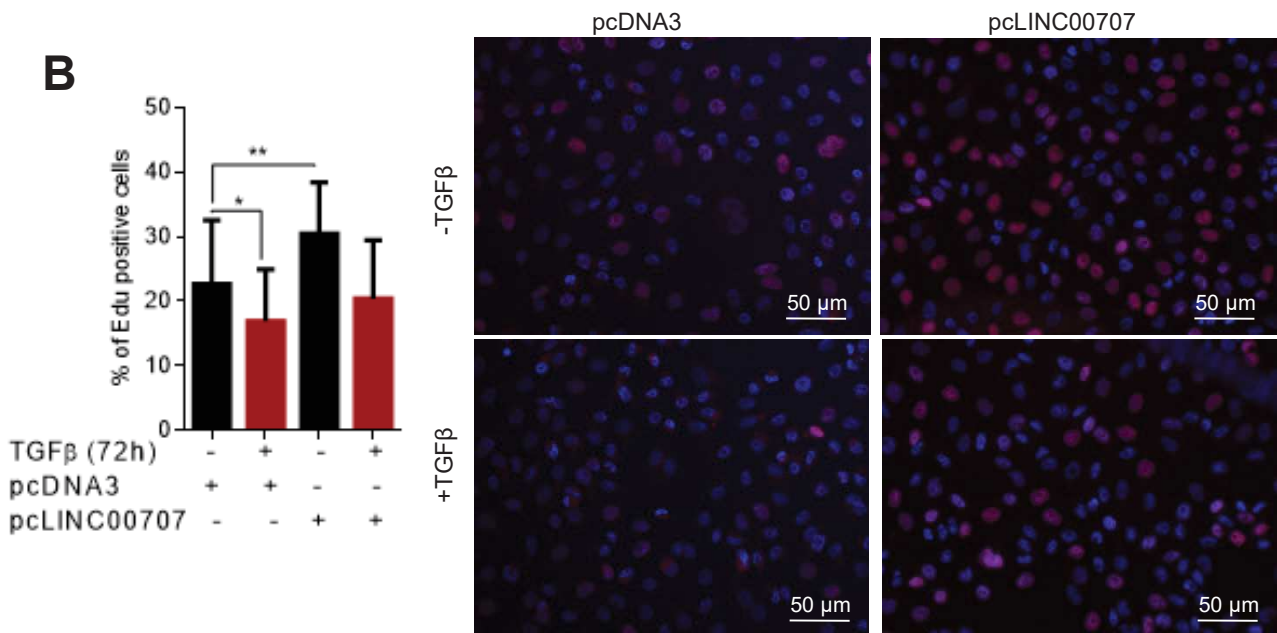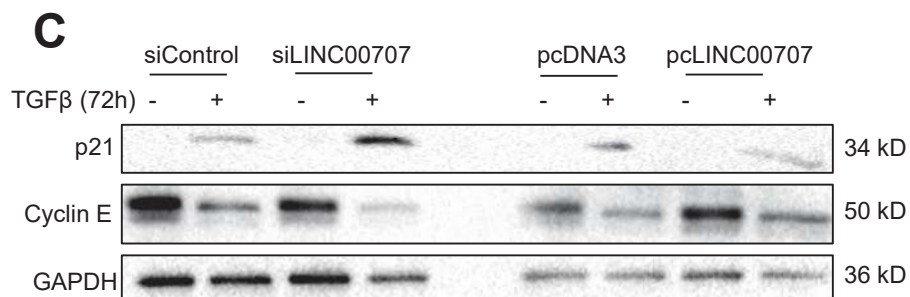

Supplemental Figure 5 related to Main Figure 6

**Fig. S5 related to Fig. 6.** *LINC00707* positively regulates cell proliferation in PC3U cells. **(A)** Percentage of Edu-positive PC3U cells transiently transfected with siRNA targeting *LINC00707* or control siRNA, and treated with TGF $\beta$  for 72 h or untreated. **(B)** Percentage of Edu-positive PC3U cells transiently transfected with pcDNA3-*LINC00707* or control pcDNA3 and treated or not with TGF $\beta$  for 72 h. **(C)** Immunoblot for the indicated proteins (CDKN1A, cyclin E) in PC3U cells transiently transfected with pcDNA3-*LINC00707* or control pcDNA3, or, control or *LINC00707*-targeting siRNAs and treated or not with TGF $\beta$  for 72 h. GAPDH serves as loading control and molecular size markers in kDa are shown. All graphs present data from (n=3) biological replicates, each with three technical repeats, as means with SEM and associated significance as: \*  $p < 0.05$ , \*\*  $p < 0.01$ , \*\*\*  $p < 0.001$ , \*\*\*\*  $p < 0.0001$ . Statistical significance of the variables was assessed by ANOVA test with Bonferroni correction.

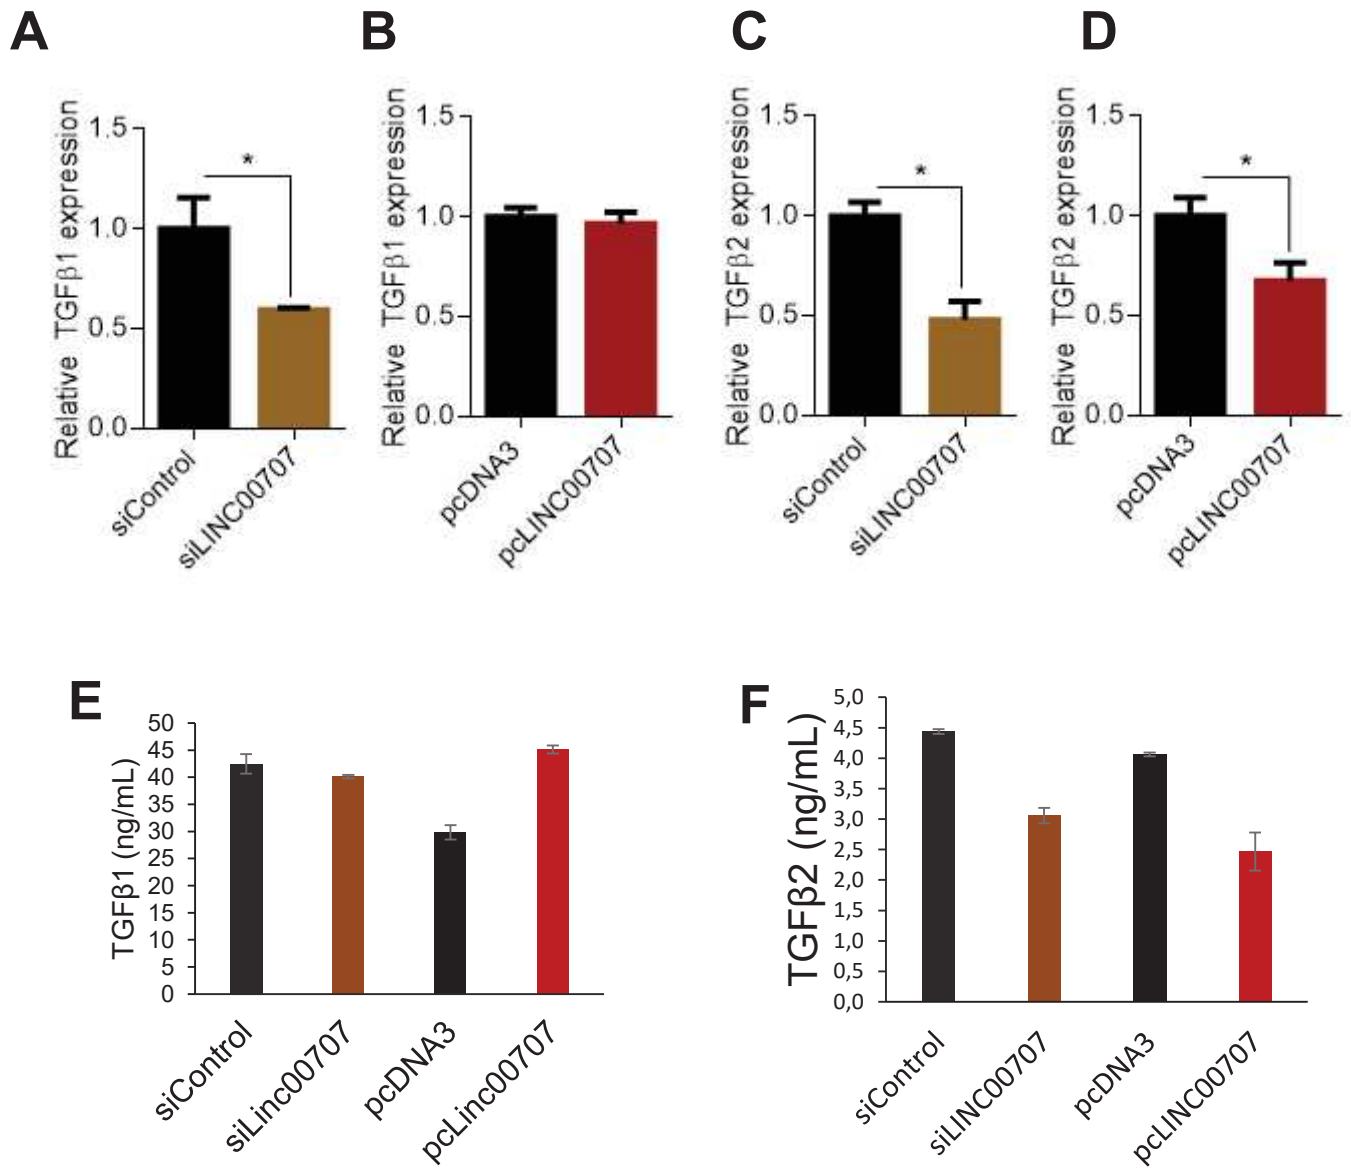

Supplemental Figure 6 related to Main Figure 7

**Fig. S6 related to Fig. 7.** *LINC00707* does not affect the TGF $\beta$  secretion in PC3U cells. **(A, B)** Real-time RT-PCR for determination of *TGF $\beta$ 1* mRNA levels in PC3U cells transiently transfected with siRNA targeting *LINC00707* or control siRNA (A), or transiently overexpressing pcDNA3-*LINC00707* or control pcDNA3 (B). **(C, D)** Real-time RT-PCR for determination of *TGF $\beta$ 2* mRNA levels in PC3U cells transiently transfected with siRNA targeting *LINC00707* or control siRNA (C), or transiently overexpressing pcDNA3-*LINC00707* or control pcDNA3 (D). All graphs present data from (n=3) biological replicates, each with three technical repeats, as means with SEM and associated significance as: \*  $p < 0.05$ , \*\*  $p < 0.01$ , \*\*\*  $p < 0.01$ , \*\*\*\*  $p < 0.0001$ . Statistical significance of the variables was assessed by unpaired Student's t-test. **(E, F)** Mature human TGF $\beta$ 1 (E) and TGF $\beta$ 2 (F) protein levels in conditioned media of PC3U cells transiently transfected with siRNA targeting *LINC00707* or control siRNA, and in PC3U cells transiently transfected with pcDNA3-*LINC00707* or control pcDNA3, determined by ELISAs. No statistical analysis was performed due to the unique biological repeat in three technical repeats and the absence of detectable change in protein levels.

**A**

| Interactor1 | Interactor2  | Score. |
|-------------|--------------|--------|
| LINC00707   | <b>CTCF</b>  | 0.6119 |
| LINC00707   | <b>FOXA1</b> | 0.4757 |
| LINC00707   | <b>SOX2</b>  | 0.4442 |
| LINC00707   | <b>ESR1</b>  | 0.3961 |
| LINC00707   | <b>TP53</b>  | 0.3908 |
| LINC00707   | <b>GATA4</b> | 0.3494 |
| LINC00707   | <b>FOXM1</b> | 0.3383 |
| LINC00707   | <b>EP300</b> | 0.2566 |
| LINC00707   | <b>EZH2</b>  | 0.253  |
| LINC00707   | <b>PPARG</b> | 0.2514 |
| LINC00707   | <b>SALL4</b> | 0.25   |
| LINC00707   | <b>SMC3</b>  | 0.2469 |
| LINC00707   | <b>SMAD2</b> | 0.2396 |
| LINC00707   | <b>BRD4</b>  | 0.2356 |
| LINC00707   | <b>CEBPB</b> | 0.2259 |
| LINC00707   | <b>JUN</b>   | 0.2258 |
| LINC00707   | <b>JUND</b>  | 0.2219 |
| LINC00707   | <b>ARNT</b>  | 0.212  |
| LINC00707   | <b>HIF1A</b> | 0.212  |
| LINC00707   | <b>SMAD3</b> | 0.2117 |
| LINC00707   | <b>STAT3</b> | 0.2041 |

**B**

|              |
|--------------|
| ESR2         |
| RNF2         |
| EZH2         |
| SUZ12        |
| ESR1         |
| UBF1/2       |
| MTF2         |
| <b>SMAD2</b> |
| <b>SMAD3</b> |
| GATA1        |
| TCF7         |
| KDM2B        |
| GATA4        |
| RACK7        |
| JARID2       |
| SMAD4        |
| ATF3         |
| CEBPD        |
| SOX2         |
| RELA         |

**C**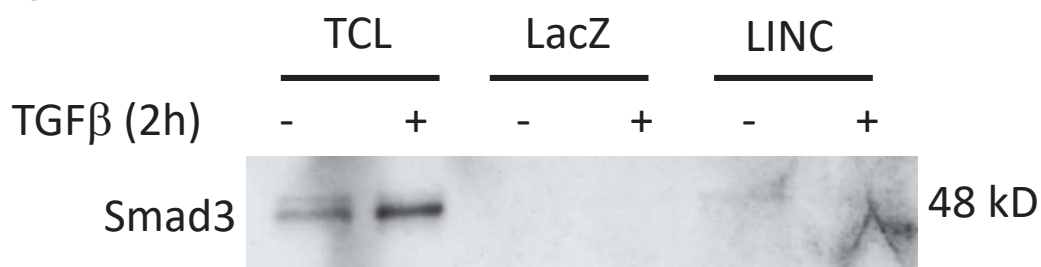

Supplemental Figure 7 related to Main Figure 7

**Fig. S7 related to Fig. 7.** Proteins predicted to interact with *LINC00707* and proteins predicted to regulate genes affected by *LINC00707* silencing. **(A)** Potential protein interactors of *LINC00707* obtained from the database RNAinter (<http://www.rnainter.org/>). The predicted interacting proteins are listed according to their score (1 for perfect match) using 0.2 as cut-off. **(B)** Potential transcription factors that bind to the promoter regions of the up-regulated genes upon stable *LINC00707* silencing in HaCaT cells (analyzed by ChEA2016). FDR<0.1. The table shows the top 20 transcription factors identified. **(C)** ChOP assay performed in PC3U cells stimulated or not with TGF $\beta$  for 2 h, using *LINC00707*-specific (LINC) or *LacZ*-specific (negative control) tiled oligonucleotides, followed by immunoblot of RNA-bound Smad3 protein. Input total cell lysate (TCL) corresponds to 10% of the lysate used for the pull-down reactions. Molecular size markers in kDa are shown. The assay is representative of four independent biological repeats.

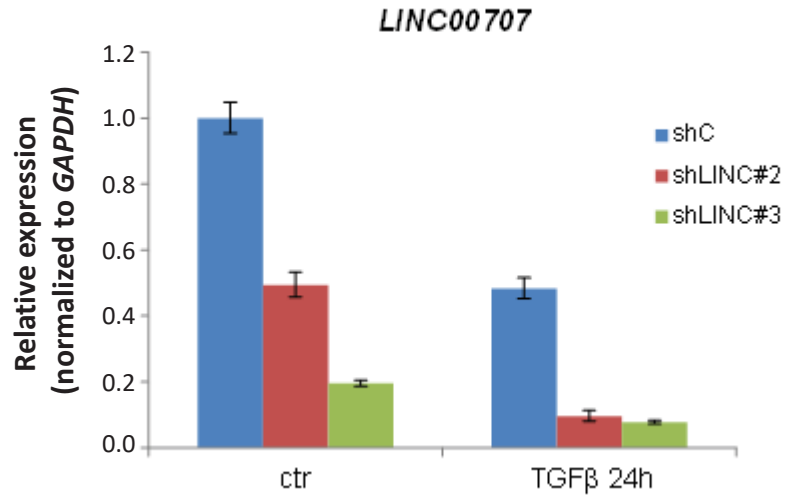

Supplemental Figure 8 related to Main Figure 9



**Fig. S8 related to Fig. 9.** Stable silencing of *LINC00707* in HaCaT cell clones used for transcriptomic analysis. Real-time RT-PCR for determination of *LINC00707* mRNA levels in HaCaT cell clones stably transfected with two different shRNAs targeting *LINC00707* (shLINC00707#2 or shLINC00707#3) or non-targeting shRNA (shC) and treated with TGF $\beta$  for 24 h or untreated. The graph presents data as means with SEM. No statistical analysis was performed due to the unique biological repeat, which included three technical repeats.
